# Supplementary material for: Ultrasmall gold decorated bimetallic metal–organic framework based nanoprobes for enhanced chemodynamic therapy with triple amplification
Source: Royal Society of Chemistry journal article supplement (doi:10.1039/d2tb02548e), 2023-01-01
Supplement: d2tb02548e1.pdf [file d2tb02548e1.pdf]

## Supporting Information

### Ultrasmall Gold Decorated Bimetallic Metal-organic Framework based Nanoprobes for Enhanced Chemodynamic Therapy with Triple Amplification

Tianzi Geng<sup>‡</sup>, Jiahe Zhang<sup>‡</sup>, Zhaoyang Wang, Yuehua Shi, Yu Shi, Leyong Zeng\*

*Key Laboratory of Medicinal Chemistry and Molecular Diagnosis of the Ministry of Education, Institute of Life Science and Green development, Chemical Biology Key Laboratory of Hebei Province, Hebei Key Laboratory of precise imaging of inflammation related tumors, College of Chemistry & Environmental Science, Hebei University, Baoding, 071002, P.R. China.*

\*Corresponding author. E-mail: zengly@hbu.cn

<sup>‡</sup>These authors contributed equally to this work.

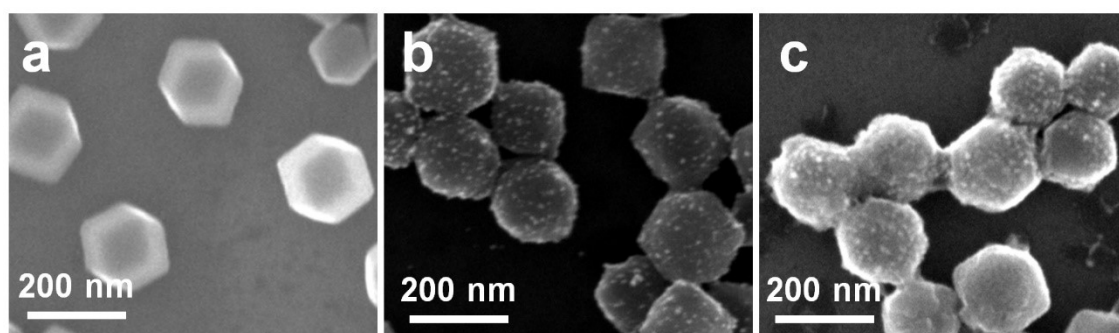

**Fig. S1.** SEM images of ZIF-67, ZIF-67@AuNPs, and ZIF-67@AuNPs@MnO<sub>2</sub>.

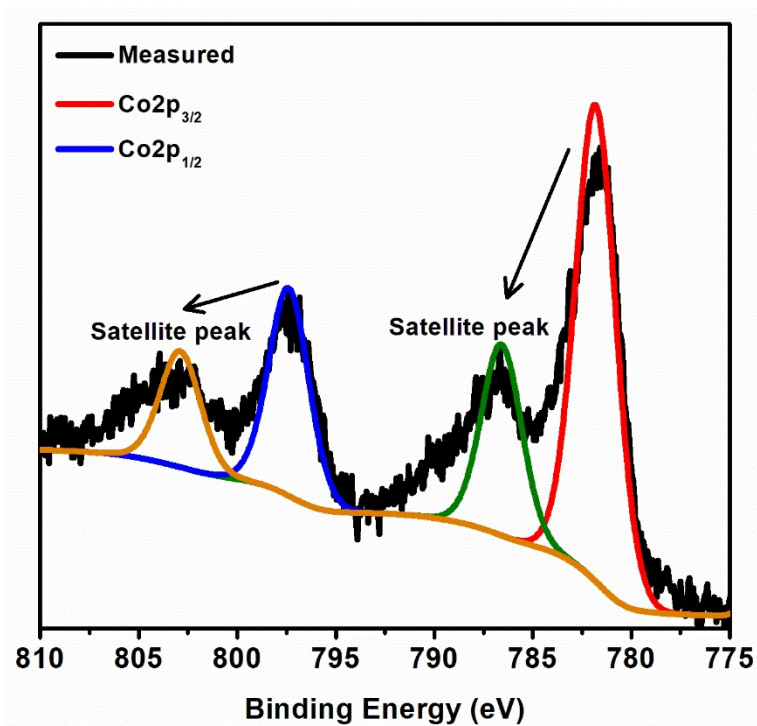

Fig. S2. Co<sub>2</sub>p XPS spectrum of ZIF-67@AuNPs.

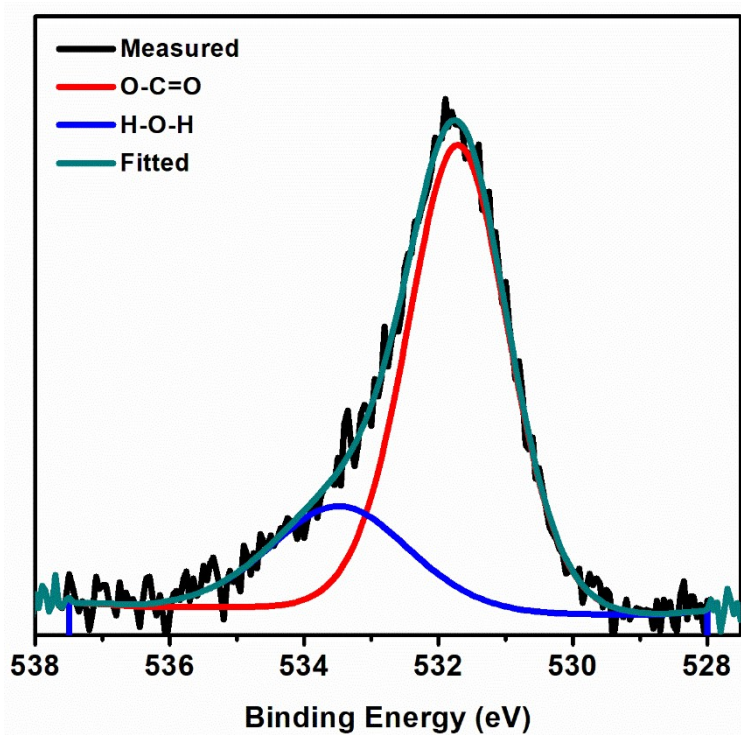

Fig. S3. O<sub>1</sub>s XPS spectrum of ZIF-67@AuNPs.

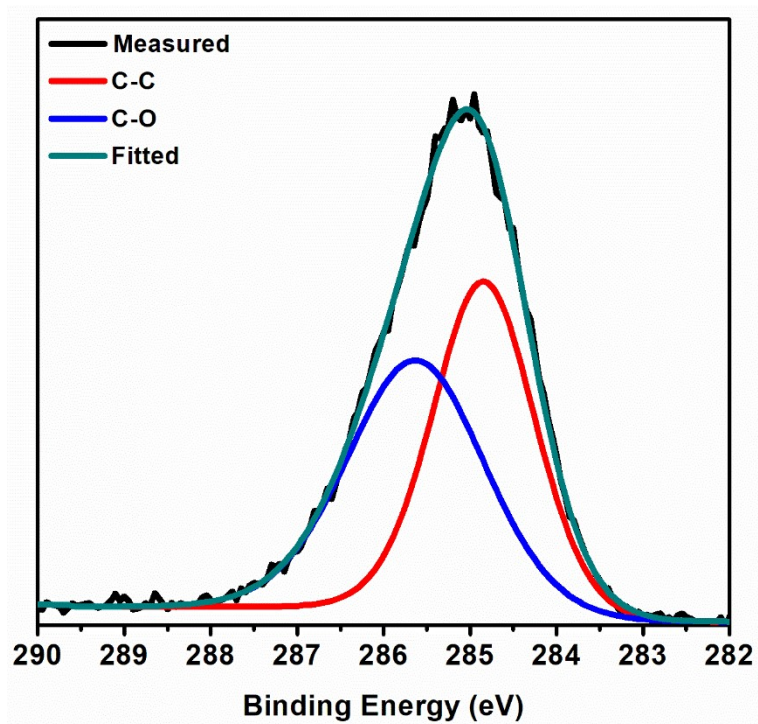

Fig. S4. C1s XPS spectrum of ZIF-67@AuNPs.

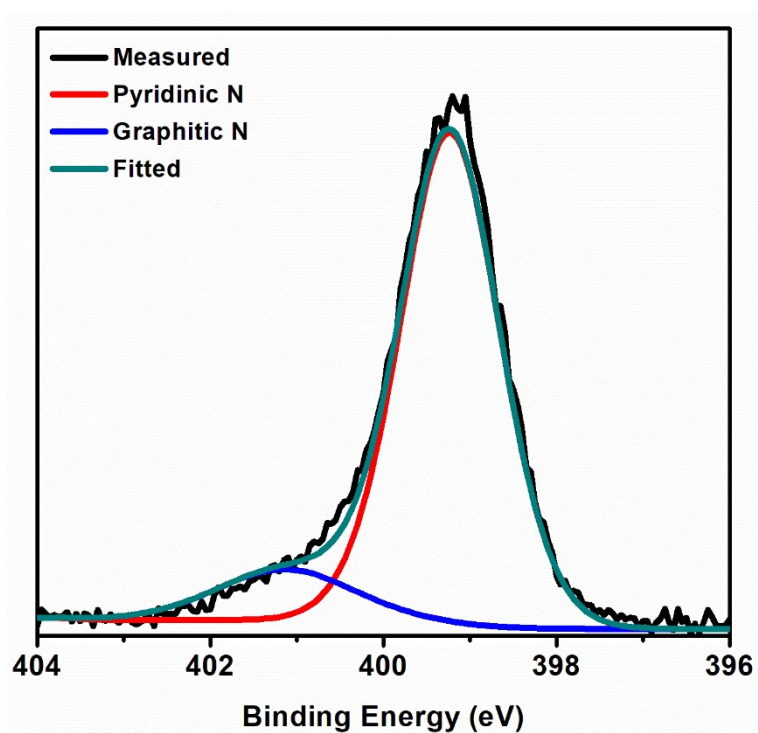

Fig. S5. N1s XPS spectrum of ZIF-67@AuNPs.

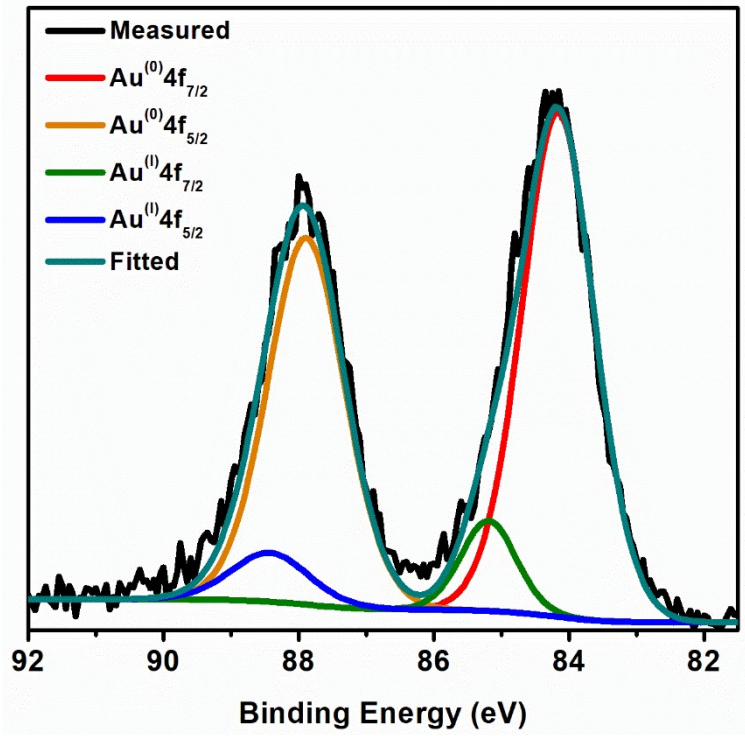

Fig. S6. Au4f XPS spectrum of ZIF-67@AuNPs.

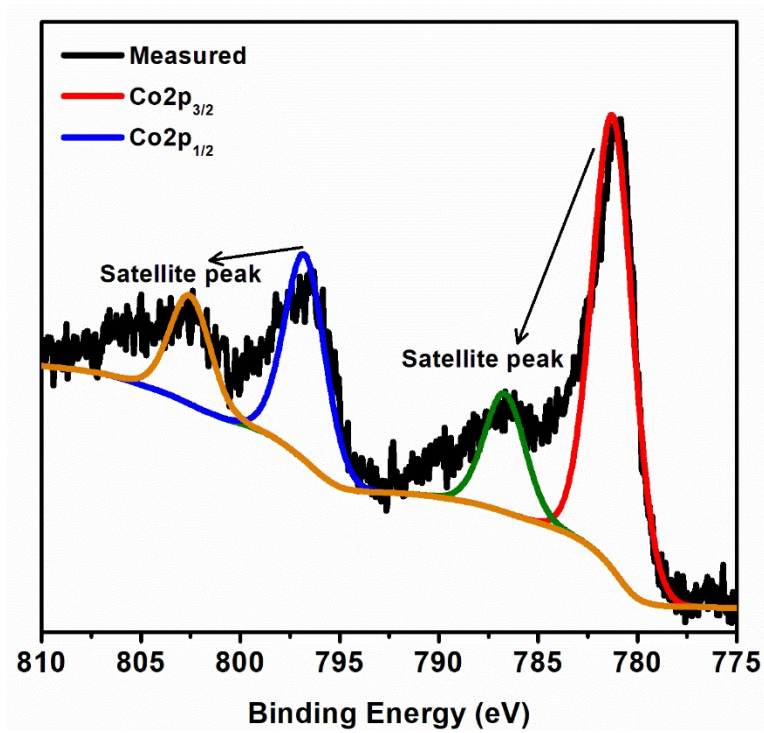

Fig. S7. Co2p XPS spectrum of ZIF-67@AuNPs@MnO<sub>2</sub>.

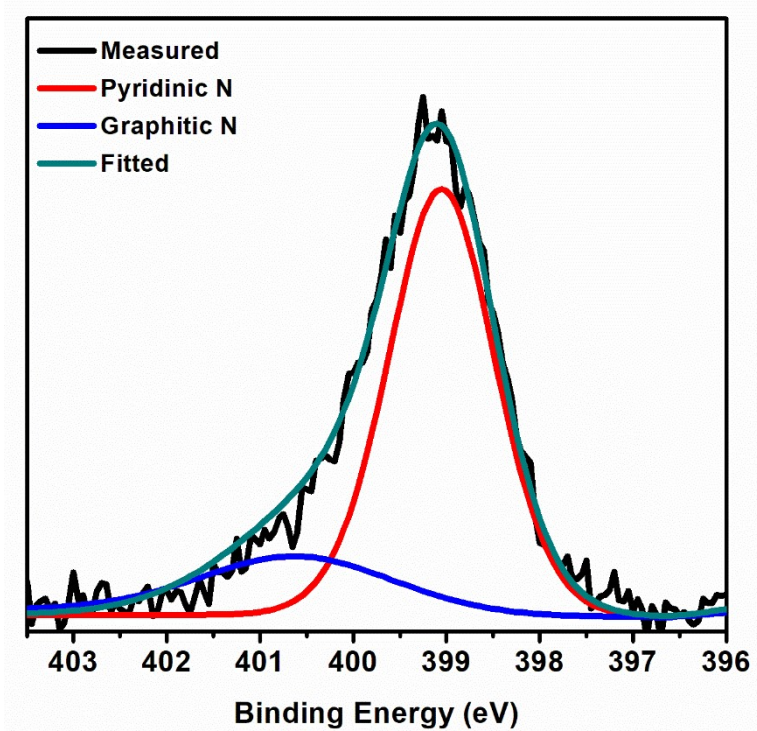

Fig. S8. N1s XPS spectrum of ZIF-67@AuNPs@MnO<sub>2</sub>.

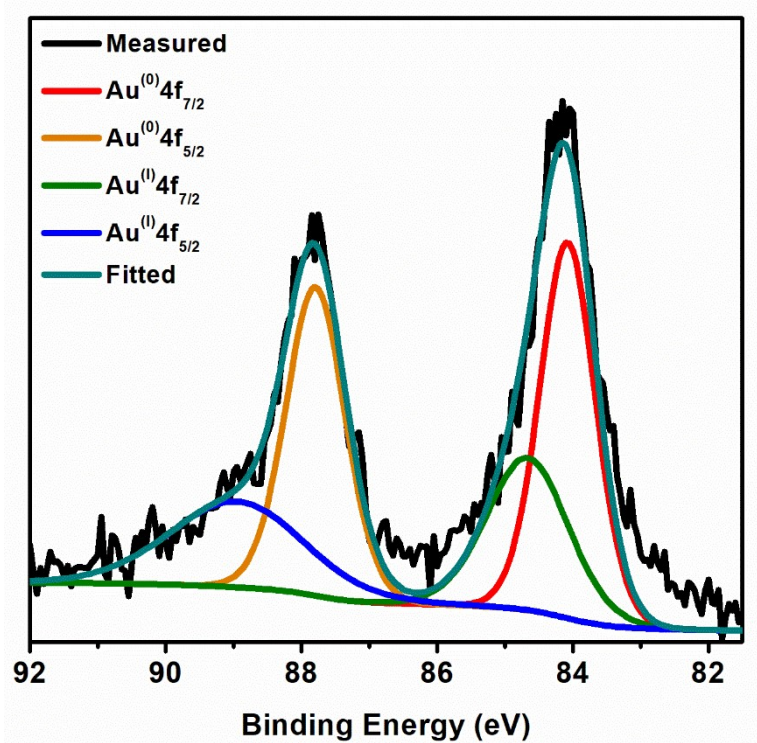

Fig. S9. Au4f XPS spectrum of ZIF-67@AuNPs@MnO<sub>2</sub>.

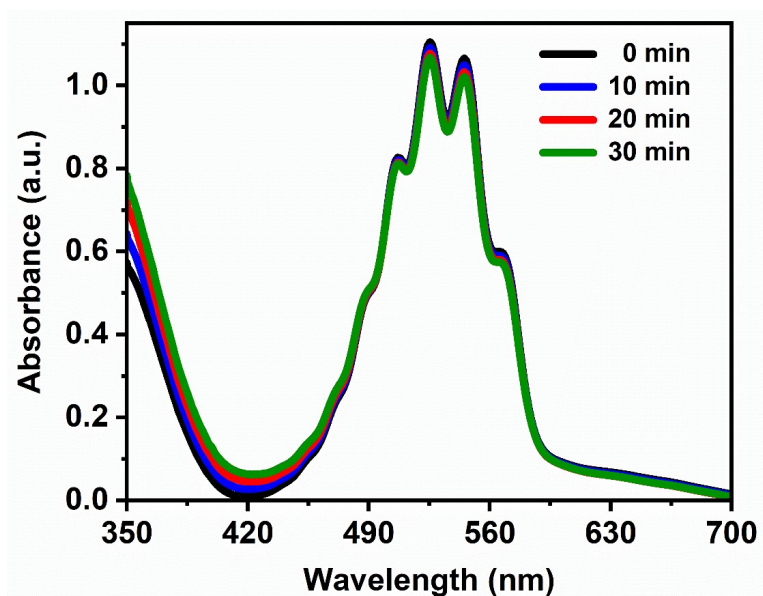

**Fig. S10.** UV-vis absorption spectra of pure KMnO<sub>4</sub> by changing incubation time.

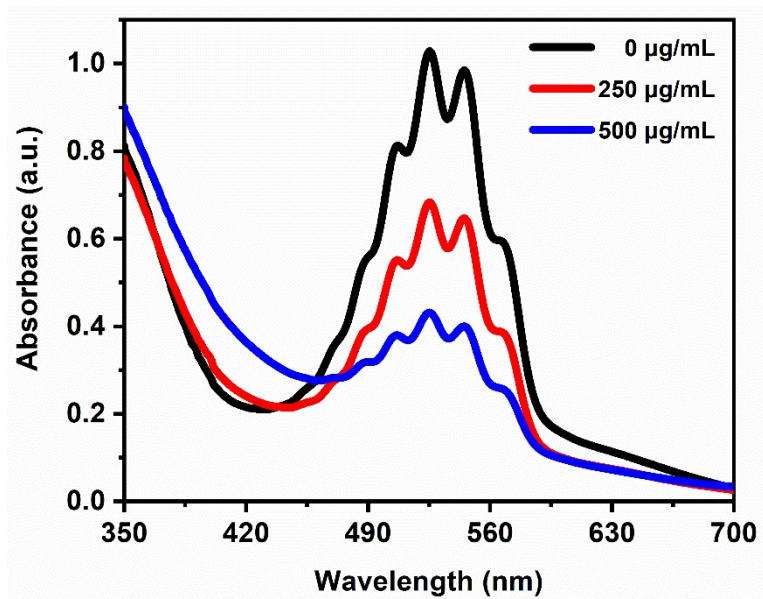

**Fig. S11.** UV-vis absorption spectra of KMnO<sub>4</sub> incubated with ZIF-67@AuNPs@MnO<sub>2</sub> by changing glucose concentration (10 min).

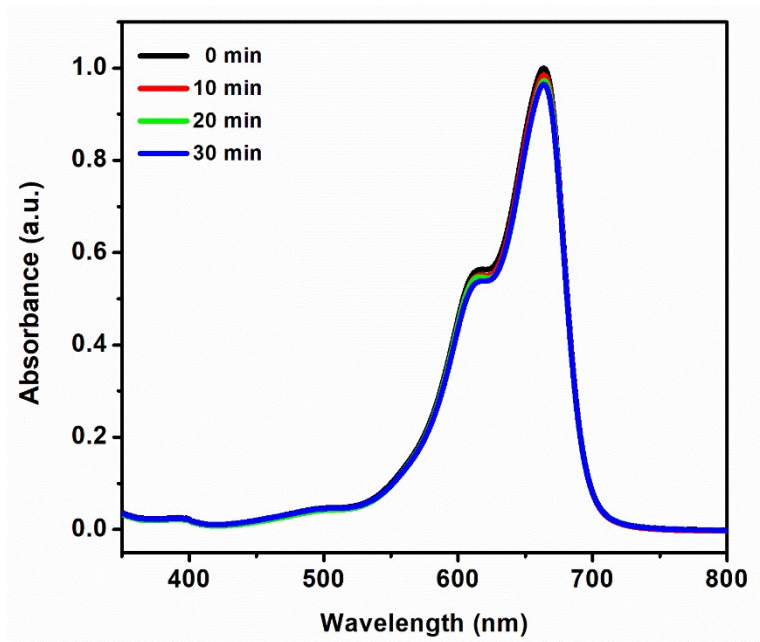

**Fig. S12.** UV-vis absorption spectra of pure MB.

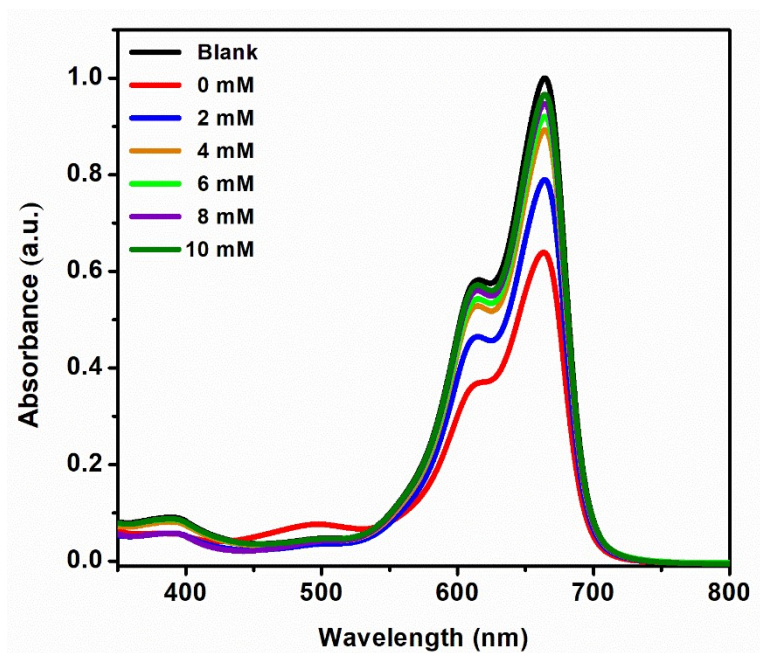

**Fig. S13.** UV-vis absorption spectra of MB incubated with ZIF-67@AuNPs by changing GSH concentration.

**Table S1.** Routine blood indexes of mice injected with ZIF-67@AuNPs@MnO<sub>2</sub>

|                                    | <b>WBC (10<sup>9</sup>/L)</b> | <b>RBC (10<sup>12</sup>/L)</b> | <b>HGB (g/L)</b> | <b>HCT (%)</b> | <b>PLT (10<sup>9</sup>/L)</b> |
|------------------------------------|-------------------------------|--------------------------------|------------------|----------------|-------------------------------|
| <b>Reference range</b>             | 0.8-6.8                       | 6.36-9.42                      | 110-143          | 34.6-44.6      | 450-1590                      |
| <b>Saline</b>                      | 7.21                          | 8.65                           | 158              | 40.5           | 925                           |
| <b>ZIF-8@AuNPs@MnO<sub>2</sub></b> | 6.96                          | 8.93                           | 161              | 40.6           | 1021                          |

**Table S2.** Blood biochemical indexes of mice injected with ZIF-67@AuNPs@MnO<sub>2</sub>

|                                    | <b>ALT (U/L)</b> | <b>AST (U/L)</b> | <b>ALP (U/L)</b> | <b>BUN (mg/dl)</b> | <b>CREA (μM)</b> |
|------------------------------------|------------------|------------------|------------------|--------------------|------------------|
| <b>Reference range</b>             | 10.06-96.47      | 67-381           | 22.52-474.35     | 10.81-34.74        | 10.91-85.09      |
| <b>Saline</b>                      | 64.5             | 253              | 312.35           | 28.34              | 65.24            |
| <b>ZIF-8@AuNPs@MnO<sub>2</sub></b> | 69.8             | 289              | 297.41           | 30.14              | 70.87            |
